# Supplementary material for: Simultaneous Action of Silymarin and Dopamine Enhances Defense Mechanisms Related to Antioxidants, Polyamine Metabolic Enzymes, and Tolerance to Cadmium Stress in Phaseolus vulgaris
Source: MDPI journal article supplement (doi:10.3390/plants11223069), 2022-11-12
Supplement: s1 [file s1]

**Table S1.** Preliminary study to identify the optimal concentrations of dopamine (DA) and silymarin (Sm) applied as seed soaking and foliar spray for *Phaseolus vulgaris* plants, as well as to identify Cd concentration that negatively affect plant growth without plant death.

| Treatment                                 | LNm<br>plant <sup>-1</sup>     | LAr (cm <sup>2</sup><br>plant <sup>-1</sup> ) | Plant DW<br>(g) | PNm pot <sup>-1</sup> | PYi<br>(g pot <sup>-1</sup> ) | TChls (mg<br>g <sup>-1</sup> FW) |
|-------------------------------------------|--------------------------------|-----------------------------------------------|-----------------|-----------------------|-------------------------------|----------------------------------|
| Control                                   | 7.56±0.25a                     | 872±71a                                       | 9.38±0.77a      | 26.8±0.72a            | 114±9a                        | 2.79±0.08a                       |
| Cd-0.25                                   | 5.33±0.18b                     | 594±43b                                       | 6.37±0.55b      | 14.5±0.39b            | 58±5b                         | 1.42±0.05b                       |
| Cd-0.5                                    | 3.18±0.11c                     | 270±14c                                       | 3.61±0.31c      | 5.33±0.18c            | 31±3c                         | 0.82±0.03c                       |
| Cd-1.0                                    | Plants died at flowering stage |                                               |                 |                       |                               |                                  |
| Control                                   | 7.56±0.25b                     | 872±71b                                       | 9.38±0.77b      | 26.8±0.72b            | 114±9b                        | 2.79±0.08b                       |
| DA <sub>(1)</sub> SP                      | 7.60±0.25b                     | 876±72b                                       | 9.44±0.78b      | 26.9±0.73b            | 116±9b                        | 2.82±0.08b                       |
| DA <sub>(2)</sub> SP                      | 8.52±0.31a                     | 1088±84a                                      | 11.60±0.82a     | 31.9±0.80a            | 138±12a                       | 3.08±0.12a                       |
| DA <sub>(3)</sub> SP                      | 8.49±0.30a                     | 1082±83a                                      | 11.57±0.80a     | 31.8±0.78a            | 136±12a                       | 3.06±0.11a                       |
| Sm <sub>(1)</sub> SP                      | 7.64±0.26b                     | 879±74b                                       | 9.46±0.79b      | 27.0±0.74b            | 119±10b                       | 2.88±0.09b                       |
| Sm <sub>(2)</sub> SP                      | 8.61±0.32a                     | 1094±86a                                      | 11.68±0.85a     | 32.0±0.82a            | 142±14a                       | 3.12±0.13a                       |
| Sm <sub>(3)</sub> SP                      | 8.58±0.31a                     | 1089±85a                                      | 11.60±0.82a     | 31.8±0.80a            | 140±13a                       | 3.10±0.12a                       |
| DA <sub>(1)</sub> FS                      | 7.64±0.26b                     | 881±74b                                       | 9.48±0.80b      | 27.2±0.74b            | 120±10b                       | 2.89±0.09b                       |
| DA <sub>(2)</sub> FS                      | 8.60±0.33a                     | 1096±86a                                      | 11.66±0.84a     | 32.1±0.83a            | 141±13a                       | 3.12±0.14a                       |
| DA <sub>(3)</sub> FS                      | 8.56±0.31a                     | 1090±83a                                      | 11.61±0.82a     | 32.0±0.82a            | 139±12a                       | 3.10±0.12a                       |
| Sm <sub>(1)</sub> FS                      | 7.74±0.28b                     | 885±76b                                       | 9.49±0.81b      | 27.1±0.76b            | 121±10b                       | 2.94±0.10b                       |
| Sm <sub>(2)</sub> FS                      | 8.68±0.34a                     | 1098±87a                                      | 11.72±0.85a     | 32.4±0.84a            | 143±15a                       | 3.14±0.14a                       |
| Sm <sub>(3)</sub> FS                      | 8.64±0.33a                     | 1095±85a                                      | 11.70±0.82a     | 32.3±0.80a            | 140±14a                       | 3.12±0.13a                       |
| Control                                   | 7.56±0.25d                     | 872±71e                                       | 9.38±0.77d      | 26.8±0.72d            | 114±9e                        | 2.79±0.08c                       |
| DA <sub>(1)</sub> SP+Sm <sub>(1)</sub> FS | 7.98±0.27c                     | 982±80d                                       | 10.4±0.79c      | 28.9±0.77c            | 128±11d                       | 3.00±0.10b                       |
| DA <sub>(2)</sub> SP+Sm <sub>(2)</sub> FS | 9.64±0.36a                     | 1422±98b                                      | 14.8±0.92a      | 37.8±0.90a            | 170±17b                       | 3.32±0.15a                       |
| DA <sub>(3)</sub> SP+Sm <sub>(3)</sub> FS | 9.08±0.30b                     | 1314±92c                                      | 14.0±0.88b      | 35.6±0.85b            | 158±14c                       | 3.03±0.12b                       |
| Sm <sub>(1)</sub> SP+DA <sub>(1)</sub> FS | 8.02±0.28c                     | 988±81d                                       | 10.5±0.80c      | 29.0±0.79c            | 130±12d                       | 3.00±0.11b                       |
| Sm <sub>(2)</sub> SP+DA <sub>(2)</sub> FS | 9.84±0.39a                     | 1496±101a                                     | 15.2±1.18a      | 39.2±1.2a             | 182±18a                       | 3.38±0.17a                       |
| Sm <sub>(3)</sub> SP+DA <sub>(3)</sub> FS | 9.05±0.30b                     | 1310±91c                                      | 14.0±0.86b      | 35.3±0.83b            | 155±14c                       | 3.00±0.11b                       |

Same or different letters after mean ± SE within each column indicate non-significant or significant differences, respectively, based on LSD test ( $p \leq 0.05$ ). LNm= leaves number, LAr= leaves area, DW= dry weight, PNm= pods number, PYi= pods yield, TChls= total chlorophylls, FW= fresh weight, Cd-0.25, Cd-0.5, and Cd-0.75= cadmium at 0.25, 0.5, and 0.75 mM, respectively, DA<sub>(1)</sub>FS, DA<sub>(2)</sub>FS, and DA<sub>(3)</sub>FS= dopamine applied as three foliar sprays at a concentration of 100, 200, and 300 µM, respectively, Sm<sub>(1)</sub>FS, Sm<sub>(2)</sub>FS, and Sm<sub>(3)</sub>FS= silymarin applied as three foliar sprays at a concentration of 200, 250, and 300 µM, respectively, DA<sub>(1)</sub>SP, DA<sub>(2)</sub>SP, and DA<sub>(3)</sub>SP= dopamine applied as seed soaking at a concentration of 100, 200, and 300 µM, respectively, Sm<sub>(1)</sub>SP, Sm<sub>(2)</sub>SP, and Sm<sub>(3)</sub>SP= silymarin applied as seed soaking at a concentration of 200, 250, and 300 µM, respectively.
